# Supplementary material
Source: Springer Nature journal article supplement (https://www.springermedizin.de/resource/supplementary/13005_2009_147_MOESM1_ESM.pdf/9626360)

# Correlation of TBV and time after grafting

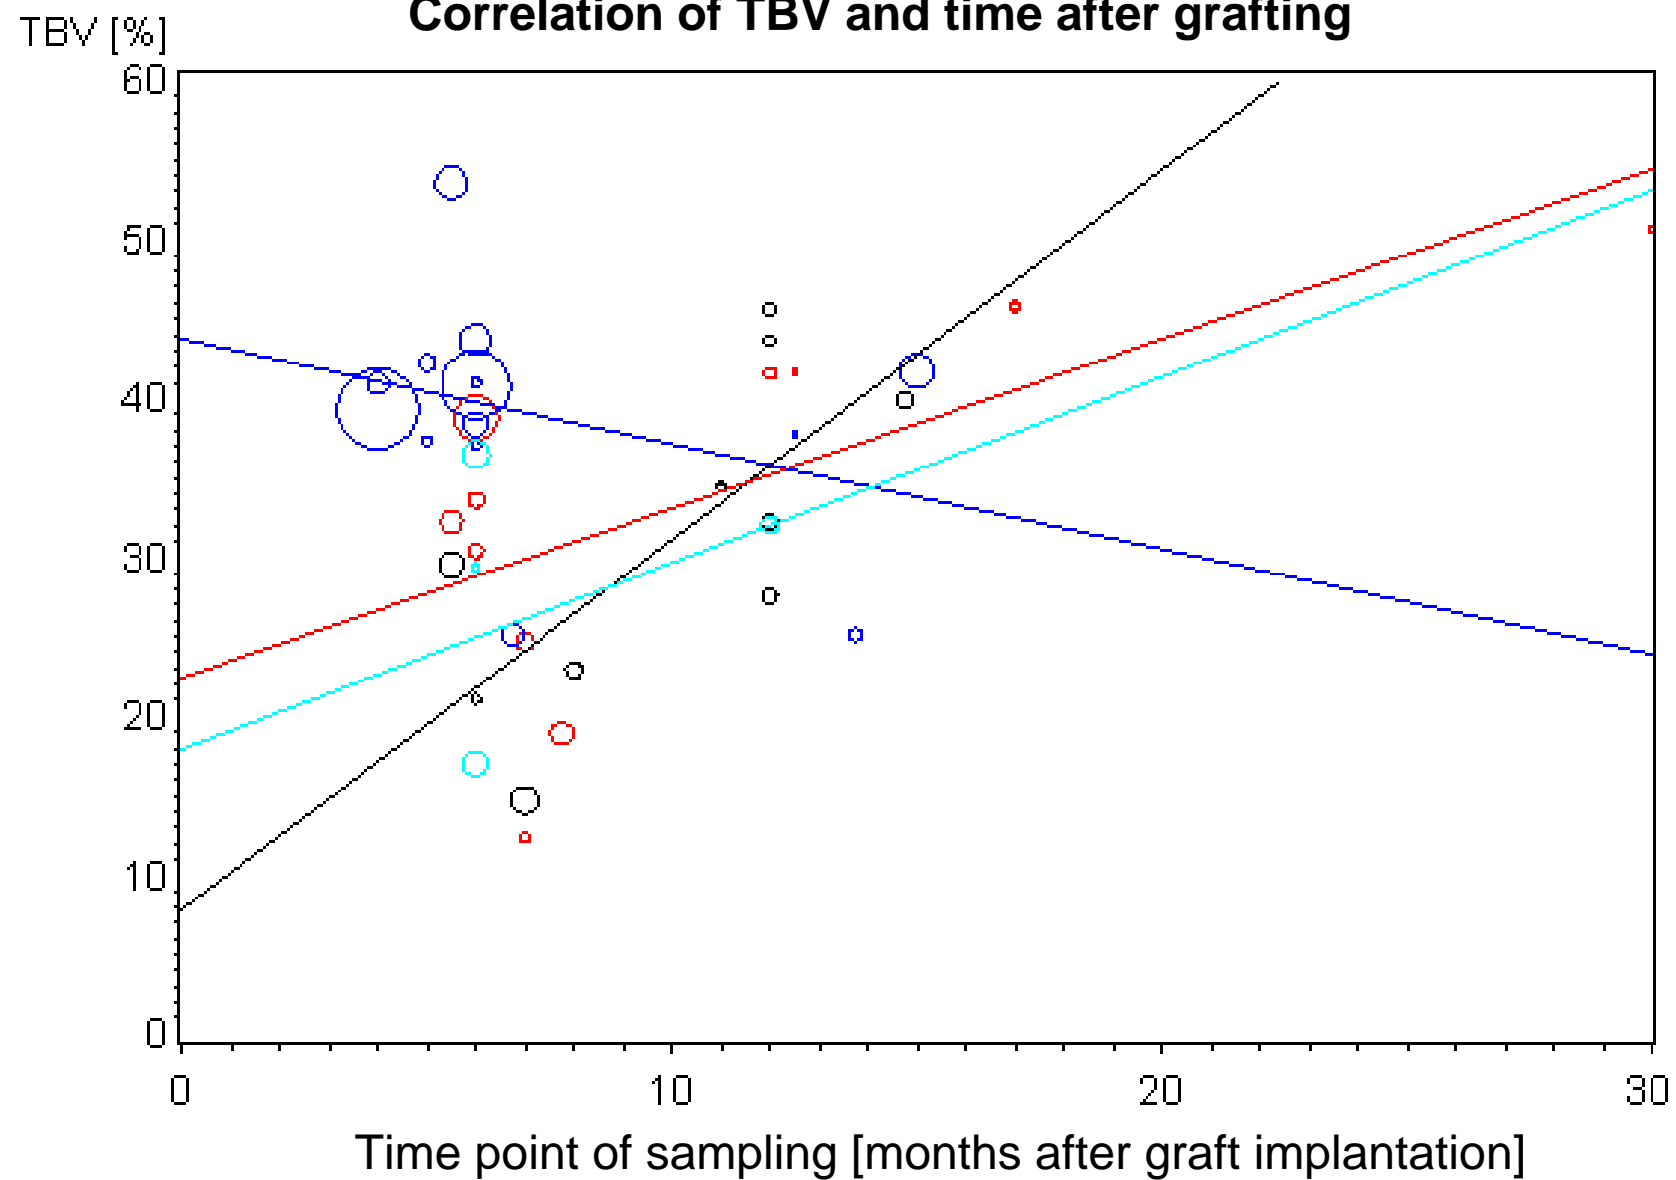

Supplement: MOESM1 [file 9626360]
